# Supplementary material for: Rewiring of glucose metabolism defines trained immunity induced by oxidized low-density lipoprotein
Source: PubMed Central journal article supplement (PMC7297856; doi:10.1007/s00109-020-01915-w), 2020-04-30
Supplement: 109_2020_1915_MOESM1_ESM.pdf [file 109_2020_1915_MOESM1_ESM.pdf]

**Table S1. Primers used for qRT-PCR analysis of mRNA expression and immunoprecipitated chromatin.**

| <b>qRT-PCR primers for gene expression analysis</b>                 |                         |                          |
|---------------------------------------------------------------------|-------------------------|--------------------------|
| <b>Gene</b>                                                         | <b>Forward(5'→3')</b>   | <b>Reverse (5'→3')</b>   |
| <i>PFKFB3</i>                                                       | ATTGCGGTTTTCGATGCCAC    | GCCACAACGTGTAGGGTCGT     |
| <i>PFKP</i>                                                         | CGCCTACCTCAACGTGGTG     | ACCTCCAGAACGAAGGTCC      |
| <i>HK2</i>                                                          | TGCCACCAGACTAACTAGACG   | CCCGTGCCCACAATGAGAC      |
| <i>PKM1</i>                                                         | CGAGCCTCAAGTCACTCCA     | GTGAGCAGACCTGCCAGAC      |
| <i>PKM2</i>                                                         | ATAACGCCTACATGGAAAAGTGT | TAAGCCCATCATCCACGTAGA    |
| <i>18s</i>                                                          | GATGGGCGGCGGAAAATAG     | GCGTGGATTCTGCATAATGGT    |
| <b>qRT-PCR primers for analysis of immunoprecipitated chromatin</b> |                         |                          |
| <i>TNF</i> promoter R1                                              | CAGGCAGGTTCTCTTCCTCT    | GCTTTCAGTGCTCATGGTGT     |
| <i>TNF</i> promoter R2                                              | AGAGGACCAGCTAAGAGGGA    | AGCTTGTCAGGGGATGTGG      |
| <i>TNF</i> promoter R3                                              | GTGCTTGTTCTCAGCCTCT     | ATCACTCCAAAGTGCAGCAG     |
| <i>TNF</i> promoter R4                                              | TGTCTGGCACACAGAAGACA    | CCCTGAGGTGTCTGGTTTTTC    |
| <i>TNF</i> promoter R5                                              | TGATGGTAGGCAGAACTTGG    | ACTAAGGCCTGTGCTGTTCC     |
| <i>IL6</i> promoter R1                                              | TCGTGCATGACTTCAGCTTT    | GCGCTAAGAAGCAGAACCAC     |
| <i>IL6</i> promoter R2                                              | AGGGAGAGCCAGAACACAGA    | GAGTTTCCTCTGACTCCATCG    |
| <i>PFKFB3</i> promoter R1                                           | TCTTCTACTCGGGGCGATAA    | GGAGCTGGACTGAAGTGGAC     |
| <i>PFKFB3</i> promoter R2                                           | TCAAGGTTCCCAGTCTTTGG    | CACCTCGTCCTTGTCCACTT     |
| <i>PFKFB3</i> promoter R3                                           | ACTGCGTCTCTGCTCTCCTC    | GCTGCTGTTATCCCCTCGT      |
| <i>HK2</i> promoter R1                                              | GAGCTCAATTCTGTGTGGAGT   | ACTTCTTGAGAACTATGTACCCTT |
| <i>PFKP</i> promoter R1                                             | CGAAGGCGATGGGGTGAC      | CATCGCTTCGCCACCTTTC      |
