# Supplementary material for: Rewiring of glucose metabolism defines trained immunity induced by oxidized low-density lipoprotein
Source: PubMed Central journal article supplement (PMC7297856; doi:10.1007/s00109-020-01915-w), 2020-04-30
Supplement: 109_2020_1915_MOESM2_ESM.pdf [file 109_2020_1915_MOESM2_ESM.pdf]

**Table S2. Baseline characteristics of the 11 participant of the metformin trial.**

| <b>Parameter</b>                 | <b>Mean (SD)</b> |
|----------------------------------|------------------|
| Sex                              | All males        |
| Age (y)                          | 21.8 (1.9)       |
| Height (m)                       | 1.83 (0.07)      |
| Weight (kg)                      | 71.7 (8.4)       |
| BMI (kg/m <sup>2</sup> )         | 21.4 (1.7)       |
| Creatinine ( $\mu\text{mol/l}$ ) | 77.7 (7.0)       |
| Total cholesterol (mmol/l)       | 4.3 (0.6)        |
| Triglycerides (mmol/l)           | 1.2 (0.6)        |
| HDL-cholesterol (mmol/l)         | 1.2 (0.4)        |
| LDL-cholesterol (mmol/l)         | 2.4 (0.7)        |
| HbA1c (mmol/mol)                 | 32 (2)           |
